# Supplementary material for: Facile synthesis, and the optical and electrical properties of nanocrystalline ZnFe2O4thin films
Source: Royal Society of Chemistry journal article supplement (doi:10.1039/c5ce02553b), 2016-01-01
Supplement: c5ce02553b1.pdf [file c5ce02553b1.pdf]

## Electronic Supplementary Information

### Facile synthesis, optical and electrical properties of nanocrystalline ZnFe<sub>2</sub>O<sub>4</sub> thin films

Mohua Chakraborty<sup>1</sup>, R.Thangavel<sup>1\*</sup>, Amrita Biswas<sup>2</sup>, G.Udayabhanu<sup>2</sup>

<sup>1</sup>Solar Energy Research Laboratory, Department of Applied Physics, Indian School of Mines, Dhanbad 826 004, India

<sup>2</sup>Department of Applied Chemistry, Indian School of Mines, Dhanbad 826 004, India

\* [thangavel.r.ap@ismdhanbad.ac.in](mailto:thangavel.r.ap@ismdhanbad.ac.in), [rthangavel@gmail.com](mailto:rthangavel@gmail.com);

#### Supporting Figures:

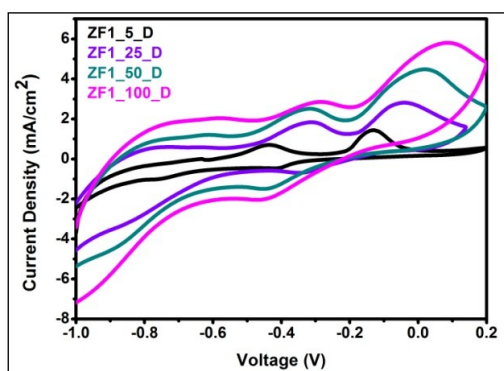

**Figure S1:** Cyclic Voltammograms for ZF1 recorded in NaOH (1M) at sweep rate  $v = 5, 25, 50, 100 \text{ mVs}^{-1}$  under dark condition.

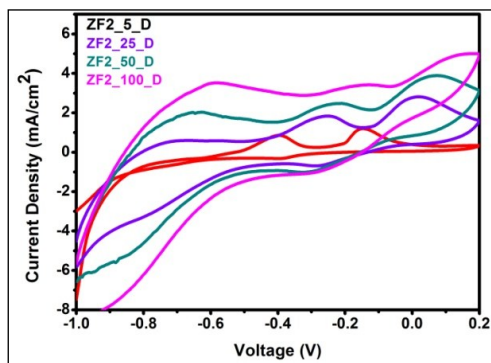

**Figure S2:** Cyclic Voltammograms for ZF2 recorded in NaOH (1M) at sweep rate  $v = 5, 25, 50, 100 \text{ mVs}^{-1}$  under dark condition.

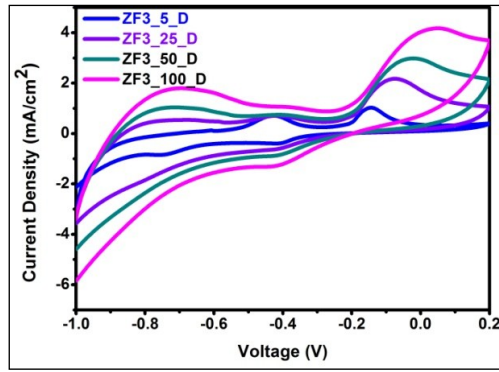

**Figure S3:** Cyclic Voltammograms for ZF3 recorded in NaOH (1M) at sweep rate  $v = 5, 25, 50, 100 \text{ mVs}^{-1}$  under dark condition.

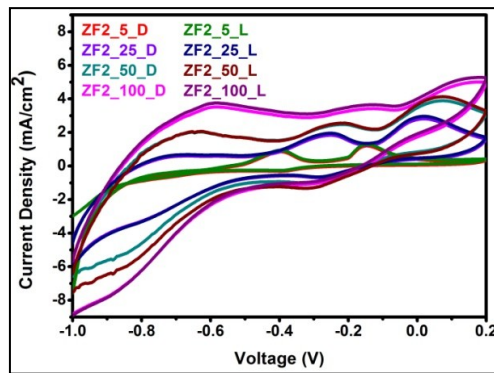

**Figure S4:** Cyclic Voltammograms for ZF2 recorded in NaOH (1M) at sweep rate  $v = 5, 25, 50, 100 \text{ mVs}^{-1}$  under dark and visible illumination condition.

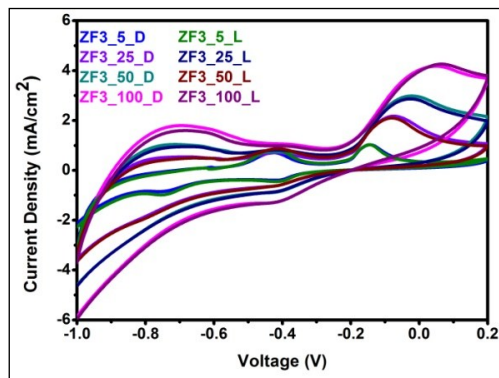

**Figure S5:** Cyclic Voltammograms for ZF3 recorded in NaOH (1M) at sweep rate  $v = 5, 25, 50, 100 \text{ mVs}^{-1}$  under dark and visible illumination condition.
